# Supplementary material
Source: publisher site journal article supplement (https://www.dovepress.com/article/384337)
Supplement: Supplementary file 1 [file get_supplementary_file.php]

## Supplementary document: questionnaire(Table version).

### Title:Attitude and willingness of Chinese adults with rheumatic diseases to receive COVID-19 vaccination

Dear friends: In order to inquire the problems,difficulties and needs of rheumatism patients in the process of COVID-19 vaccination,our hospital(Futian Rheumatology Hospital,Shenzhen,China) and a team from the Public Health Department of Sun Yat-sen University,China conduct a survey.The questionnaire we provided is answered anonymously.Completion of the network survey did not result in any benefit or financial compensation for respondents who finish this survey.This questionnaire contains 22 questions and takes about 3 minutes. Thank you for your support and cooperation!

| Number | Item                            | Choice                                                                                                                                                                                                 |
|--------|---------------------------------|--------------------------------------------------------------------------------------------------------------------------------------------------------------------------------------------------------|
| Q1     | Gender                          | <input type="checkbox"/> Male <input type="checkbox"/> Female                                                                                                                                          |
| Q2     | Age                             | <input type="checkbox"/> 18-35 years old <input type="checkbox"/> 36-45 years old <input type="checkbox"/> 46-60 years old                                                                             |
| Q3     | Educational level               | <input type="checkbox"/> High school and below <input type="checkbox"/> University <input type="checkbox"/> Master degree or above                                                                     |
| Q4     | Current marital status          | <input type="checkbox"/> Unmarried <input type="checkbox"/> Married without child <input type="checkbox"/> Married with children <input type="checkbox"/> Others                                       |
| Q5     | Monthly income(yuan)            | <input type="checkbox"/> ≤5000 <input type="checkbox"/> 5001-10000 <input type="checkbox"/> ≥10001                                                                                                     |
| Q6     | Employment status               | <input type="checkbox"/> Yes <input type="checkbox"/> No                                                                                                                                               |
| Q7     | Current medical expenses        | <input type="checkbox"/> Personal expense <input type="checkbox"/> Medical insurance                                                                                                                   |
| Q8     | Rheumatism duration (years)     | <input type="checkbox"/> <2 <input type="checkbox"/> 2-5 <input type="checkbox"/> >5                                                                                                                   |
| Q9     | Diagnosis                       | <input type="checkbox"/> SLE <input type="checkbox"/> RA <input type="checkbox"/> AS <input type="checkbox"/> GOUT <input type="checkbox"/> PSS                                                        |
| Q10    | Concomitant systemic impairment | <input type="checkbox"/> Yes <input type="checkbox"/> No                                                                                                                                               |
| Q11    | Drugs used within three months  | <input type="checkbox"/> Corticosteroid <input type="checkbox"/> HCQ <input type="checkbox"/> MTX<br><input type="checkbox"/> LEF <input type="checkbox"/> FEBOXOSTAT <input type="checkbox"/> bDMARDs |

|     |                                                                                                                                    |                                                                                                                                                                                                                                                                                                                                                                                                                                                                                                                                                                                                                                                                                                                                                    |
|-----|------------------------------------------------------------------------------------------------------------------------------------|----------------------------------------------------------------------------------------------------------------------------------------------------------------------------------------------------------------------------------------------------------------------------------------------------------------------------------------------------------------------------------------------------------------------------------------------------------------------------------------------------------------------------------------------------------------------------------------------------------------------------------------------------------------------------------------------------------------------------------------------------|
| Q12 | Way of communication with doctors                                                                                                  | <input type="checkbox"/> Hospital <input type="checkbox"/> WeChat <input type="checkbox"/> Medical online platform<br><input type="checkbox"/> Phone                                                                                                                                                                                                                                                                                                                                                                                                                                                                                                                                                                                               |
| Q13 | Why didn't you intent to be vaccinated?                                                                                            | <input type="checkbox"/> There are contraindications to vaccination<br><input type="checkbox"/> In the acute stage of acute diseases and chronic diseases <input type="checkbox"/> Plan for pregnancy <input type="checkbox"/> Worried that the disease will worsen due to the discontinuation of Rheumatism drugs during vaccination <input type="checkbox"/> Worried about the side effects of vaccines <input type="checkbox"/> There are no cases of COVID-19 in the local area and there is no need to vaccinate <input type="checkbox"/> Vaccination is inconvenient <input type="checkbox"/> Not informed <input type="checkbox"/> Vaccine shortage <input type="checkbox"/> Currently vaccinated with other vaccines (such as HPV vaccine) |
| Q14 | Do you think it is important to receive COVID-19 vaccine for RD patients?                                                          | <input type="checkbox"/> 1 <input type="checkbox"/> 2 <input type="checkbox"/> 3 <input type="checkbox"/> 4 <input type="checkbox"/> 5                                                                                                                                                                                                                                                                                                                                                                                                                                                                                                                                                                                                             |
| Q15 | Have you known the COVID-19 vaccination guidelines (the first edition) issued by China Health and Health Commission in March 2021? | <input type="checkbox"/> Yes <input type="checkbox"/> No                                                                                                                                                                                                                                                                                                                                                                                                                                                                                                                                                                                                                                                                                           |
| Q16 | What types of COVID-19 vaccine do you know at present?                                                                             | <input type="checkbox"/> Inactivated vaccine <input type="checkbox"/> Adenovirus vector vaccine<br><input type="checkbox"/> Recombinant subunit vaccine <input type="checkbox"/> Nucleic acid vaccine <input type="checkbox"/> Attenuated influenza virus vector vaccine <input type="checkbox"/> mRNA vaccine <input type="checkbox"/> Don't know                                                                                                                                                                                                                                                                                                                                                                                                 |
| Q17 | To what extent do you agree that vaccination against COVID-19 is one of the important method to prevent and control the epidemic?  | <input type="checkbox"/> 1 <input type="checkbox"/> 2 <input type="checkbox"/> 3 <input type="checkbox"/> 4 <input type="checkbox"/> 5                                                                                                                                                                                                                                                                                                                                                                                                                                                                                                                                                                                                             |
| Q18 | Do you think COVID-19 vaccine should be vaccinated for all?                                                                        | <input type="checkbox"/> Yes <input type="checkbox"/> No                                                                                                                                                                                                                                                                                                                                                                                                                                                                                                                                                                                                                                                                                           |
| Q19 | Which aspects are you most concerned about COVID-19 vaccine?                                                                       | <input type="checkbox"/> Security <input type="checkbox"/> Curative effect <input type="checkbox"/> Impact on rheumatism                                                                                                                                                                                                                                                                                                                                                                                                                                                                                                                                                                                                                           |
| Q20 | Do you think COVID-19 vaccine is effective?                                                                                        | <input type="checkbox"/> 1 <input type="checkbox"/> 2 <input type="checkbox"/> 3                                                                                                                                                                                                                                                                                                                                                                                                                                                                                                                                                                                                                                                                   |
| Q21 | What do you think about the level of risk degree of the COVID-19 vaccine?                                                          | <input type="checkbox"/> 1 <input type="checkbox"/> 2 <input type="checkbox"/> 3 <input type="checkbox"/> 4 <input type="checkbox"/> 5                                                                                                                                                                                                                                                                                                                                                                                                                                                                                                                                                                                                             |

|     |                                                   |                                                          |
|-----|---------------------------------------------------|----------------------------------------------------------|
| Q22 | Did you intent to be vaccinated against COVID-19? | <input type="checkbox"/> Yes <input type="checkbox"/> No |
|-----|---------------------------------------------------|----------------------------------------------------------|

**Abbreviations:** Systemic Lupus Erythematosus (SLE), rheumatoid arthritis (RA), ankylosing spondylitis (AS), primary Sjogren 's syndrome (PSS ), hydroxychloroquine (HCQ), Methotrexate (MTX), Leflunomide (LEF), Biological disease relief anti-rheumatic drugs (bDMARDs), rheumatoid arthritis (RA).

**Notes:**Please select the appropriate option for the following statements based on your actual situation,where the degree of importance is expressed as:1-very important,2-more important,3-uncertain,4-less important,5-very unimportant; agree The degree is expressed as:1-very important,2-relatively agree,3-indifferent,4-relatively agree,5-very agree; the effective degree is expressed as 1-effective,2-general,3-invalid;the degree of risk is expressed as:1 -The risk is extremely small,2- the risk is small,3- the risk is average,4- the risk is greater,and the 5- risk is extremely high.
